# Supplementary material
Source: Royal Society of Chemistry journal article supplement (doi:10.1039/d6cp00681g)
Supplement: d6cp00681g1.pdf [file d6cp00681g1.pdf]

Global minimum structures and electronic stability of Pt-doped  
silicon clusters  $\text{PtSi}_n$  ( $n = 2$  to 11) in neutral and anionic charge  
states

Electronic Supplementary Information

José Manuel Guevara-Vela<sup>a</sup>, Peter L. Rodríguez-Kessler<sup>b,\*</sup>, Alvaro Muñoz-Castro<sup>c</sup>, Tomás  
Rocha-Rinza<sup>d,\*\*</sup>

<sup>a</sup>*School of Engineering and Physical Sciences, Heriot-Watt University, Edinburgh EH14 4AS, Scotland, U.K.*

<sup>b</sup>*Centro de Investigaciones en Óptica A.C., Loma del Bosque 115, Col. Lomas del Campestre, León,  
Guanajuato, Mexico*

<sup>c</sup>*Facultad de Ingeniería, Universidad San Sebastián, Bellavista 7, Santiago, 8420524, Chile.*

<sup>d</sup>*Instituto de Química, Universidad Nacional Autónoma de México, Circuito Exterior, Ciudad Universitaria,  
Delegación Coyoacán C.P. 04510, Ciudad de México, Mexico.*

---

---

**1. xyz files**

In this link

<https://doi.org/10.5281/zenodo.19357337>

the interested reader can download the xyz files of the local minima populations of the  $\text{PtSi}_n$  ( $n = 2 - 11$ ) clusters addressed in this investigation.

---

\*To whom correspondence should be addressed: [plkessler@cio.mx](mailto:plkessler@cio.mx)

\*\*To whom correspondence should be addressed: [trocha@iquimica.unam.mx](mailto:trocha@iquimica.unam.mx)

## 2. Electrostatic potential surface peak values

Table S1: Peak values of  $V_{S,\max}$  (kcal mol<sup>-1</sup>) and FIA<sup>direct</sup> (kJ mol<sup>-1</sup>) for the PtSi<sub>n</sub> series.

|                    | $V_{S,\max}$ | FIA <sup>direct</sup> |
|--------------------|--------------|-----------------------|
| PtSi <sub>2</sub>  | 28.2         | 321.7                 |
| PtSi <sub>3</sub>  | 29.0         | 361.8                 |
| PtSi <sub>4</sub>  | 33.2         | 371.1                 |
| PtSi <sub>5</sub>  | 20.7         | 330.9                 |
| PtSi <sub>6</sub>  | 21.3         | 330.5                 |
| PtSi <sub>7</sub>  | 25.7         | 367.7                 |
| PtSi <sub>8</sub>  | 25.4         | 361.9                 |
| PtSi <sub>9</sub>  | 28.9         | 381.5                 |
| PtSi <sub>10</sub> | 25.7         | 374.4                 |
| PtSi <sub>11</sub> | 23.2         | 372.3                 |

### 3. Evolution of $V_{S,\max}$ and $\text{FIA}^{\text{direct}}$

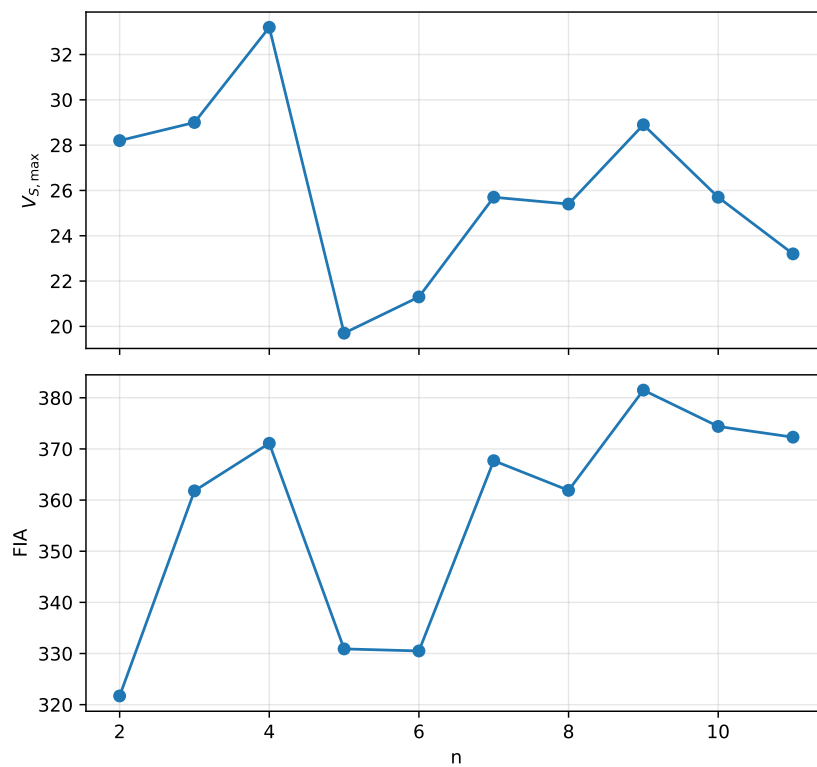

Figure S1: Size dependence of the maximum electrostatic potential on the van der Waals surface,  $V_{S,\max}$  (top), and the fluoride ion affinity (FIA) (bottom) for  $\text{PtSi}_n$  clusters as a function of  $n$  ( $n = 2 - 10$ ).

4. Structures of the lowest-lying pure Silicon clusters and low-lying energy isomers of the  $\text{PtSi}_n$  and  $\text{PtSi}_n^-$  clusters

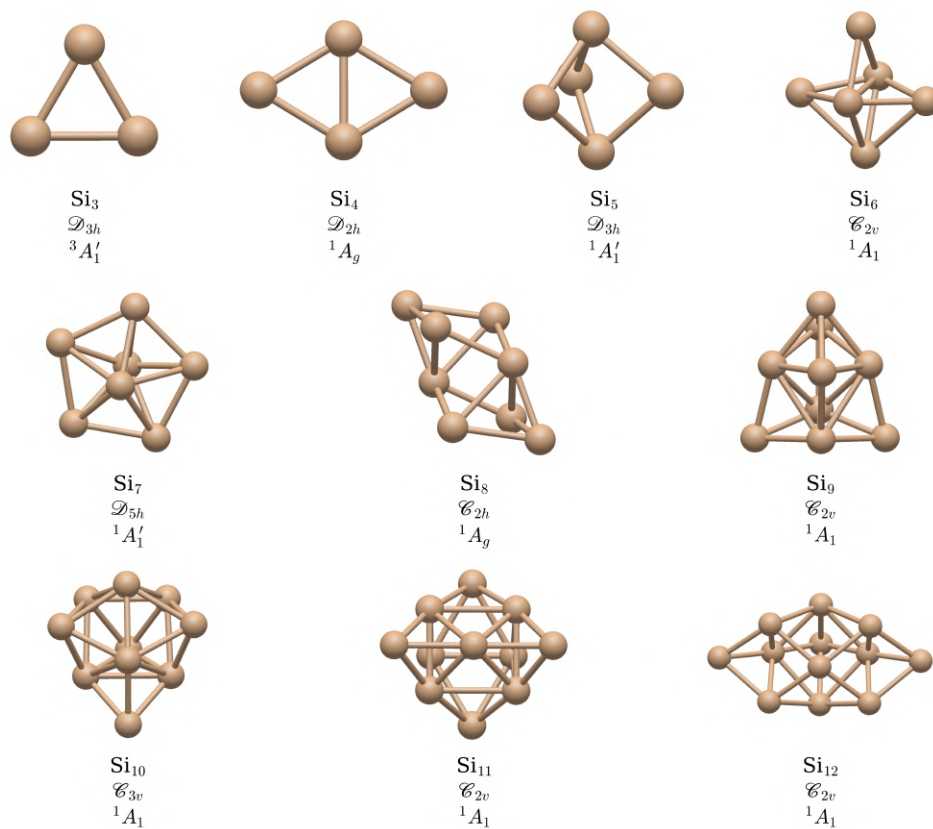

Figure S2: Lowest-lying energy isomers of the  $\text{Si}_n$   $n = 3 - 12$  clusters. The structures were taken from the Quantum Cluster Database (<https://muellergroup.jhu.edu/qcd/>).

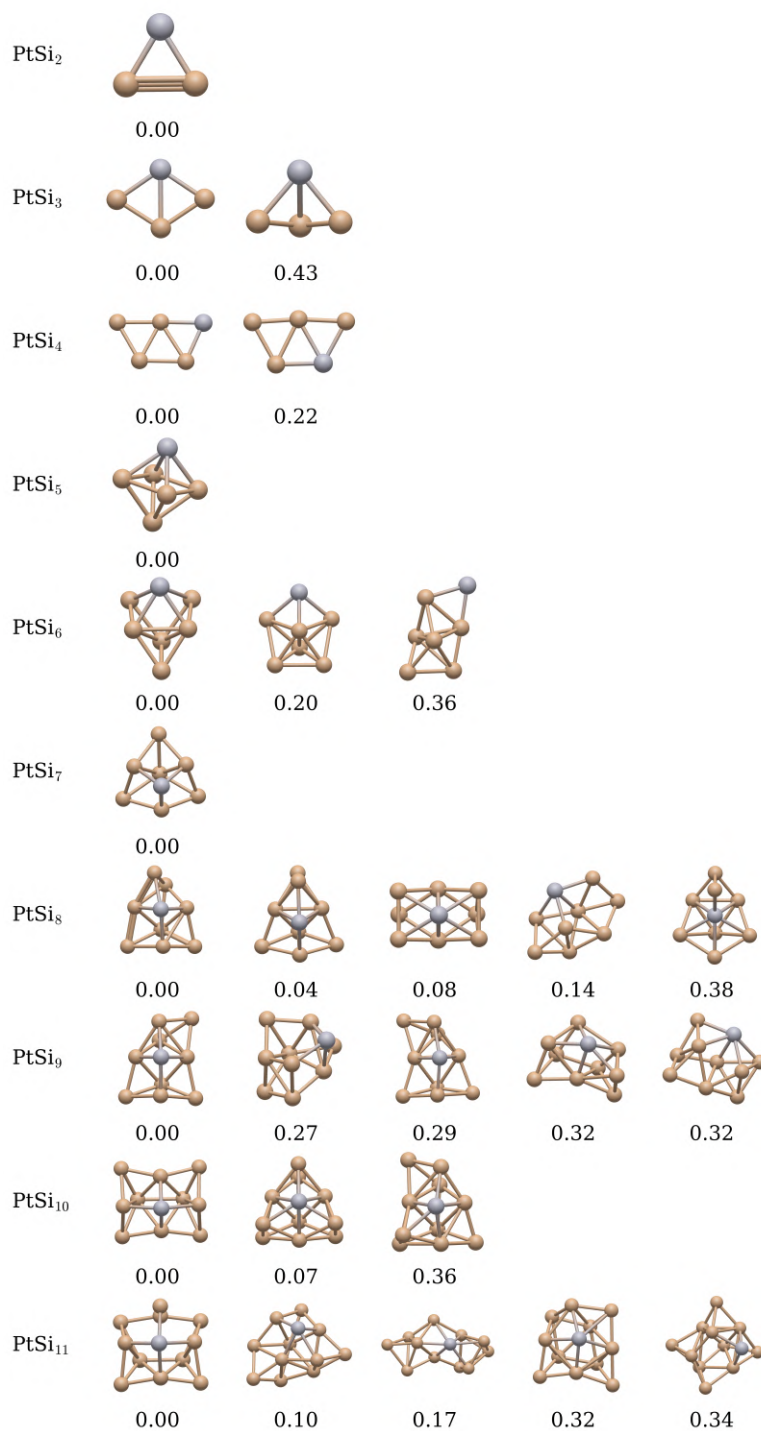

Figure S3: Low-lying energy isomers of the neutral PtSi<sub>n</sub> n = 2 – 11 clusters up to 0.5 eV. Relative energies in eV.

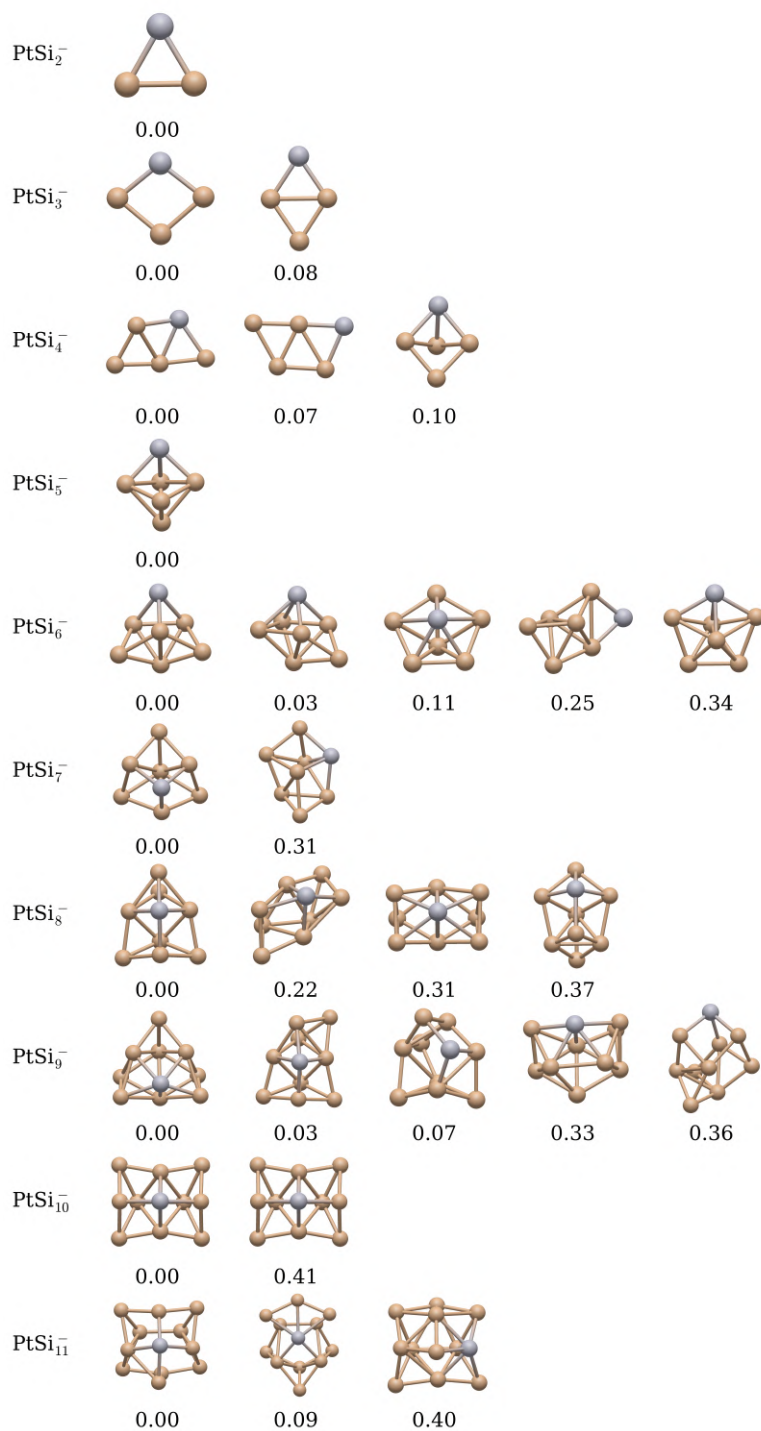

Figure S4: Low-lying energy isomers of the anionic PtSi<sub>n</sub><sup>-</sup> n = 2 – 11 clusters up to 0.5 eV. Relative energies in eV.

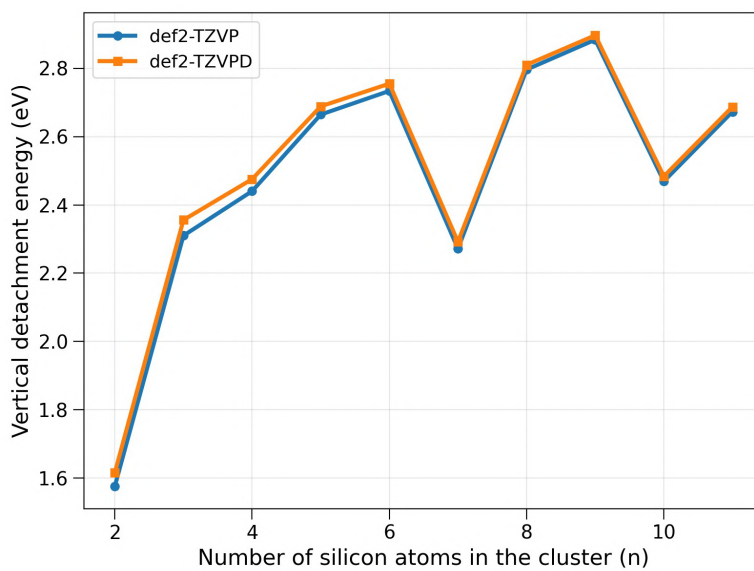

Figure S5: Vertical detachment energies for  $\text{PtSi}_n^-$  clusters as a function of cluster size  $n$ , computed with the PBE0/def2-TZVP and PBE0/def2-TZVPD approximations.
